# Supplementary material for: A Delphi Study to prioritize implementation strategies to increase the adoption of screening and referral for brain injury among survivors of intimate partner violence and sexual assault within community-based organizations
Source: Research Square preprint supplement (doi:10.21203/rs.3.rs-6925920/v1), 2025-07-15
Supplement: Supplementary file 1 [file 0bb98cf4c94724fc6ac6c538.docx]

**Appendix 1. Delphi Survey Questions**

1. Name of your organization
2. In what county is your organization located?
3. What is your role in the organization?
4. What is your profession?
5. How many years have you been in this profession?
6. How long have you worked at this organization?
7. How old are you?
8. What gender best defines you?
9. What is your education level?
10. Which category best defines your ethnicity?
11. Which category might best describe your race?
12. Please classify the following **educate strategies**. Classify them into the following categories: Must Have,' for strategies you consider most crucial. 'Nice to Have,' for important strategies but with others of higher priority. 'Don't Need,' for strategies you believe could be excluded. 'Need More Information,' for strategies where you seek clarity on their meaning.
13. Please classify the following **technical assistance strategies**. Classify them into the following categories: Must Have,' for strategies you consider most crucial. 'Nice to Have,' for important strategies but with others of higher priority. 'Don't Need,' for strategies you believe could be excluded. 'Need More Information,' for strategies where you seek clarity on their meaning.
14. Please classify the following **build staff and leadership strategies.** Classify them into the following categories: Must Have,' for strategies you consider most crucial. 'Nice to Have,' for important strategies but with others of higher priority. 'Don't Need,' for strategies you believe could be excluded. 'Need More Information,' for strategies where you seek clarity on their meaning.
15. Please classify the following **management and evaluation strategies.** Classify them into the following categories: Must Have,' for strategies you consider most crucial. 'Nice to Have,' for important strategies but with others of higher priority. 'Don't Need,' for strategies you believe could be excluded. 'Need More Information,' for strategies where you seek clarity on their meaning.
16. Please classify the following **organizational and workflow strategies**. Classify them into the following categories: Must Have,' for strategies you consider most crucial. 'Nice to Have,' for important strategies but with others of higher priority. 'Don't Need,' for strategies you believe could be excluded. 'Need More Information,' for strategies where you seek clarity on their meaning.

Ranks:

Groups - Must have

Groups - Nice to have

Groups - Don't need (exclude)

Groups - Need more information

| **EDUCATE STRATEGIES** |
| --- |
| 1- Develop an implementation glossary |
| 2- Recruit, designate, and train for leadership |
| 3-Visit other sites |
| 4-Conduct ongoing training. |
| 5- Conduct educational meetings. |
| 6- Conduct educational outreach visits. |
| 7- Develop educational materials. |
| 8- Distribute educational materials. |
| 9- Make training dynamic |
| 10- Shadow other experts |
| 11- Use train-the-trainer strategies |
| 12-Prepare patients/consumers to be active participants |

| **TECHNICAL ASSISTANCE STRATEGIES** |
| --- |
| 13- Centralize technical assistance |
| 14- Facilitation |
| 15- Provide local technical assistance |
| 16-Use an implementation adviser |
| 17- Provide ongoing consultation |

| **BUILD STAFF AND LEADERSHIP STRATEGIES** |
| --- |
| 18- Assess for readiness and identify barriers and facilitators |
| 19- Develop a formal implementation blueprint |
| 20-Identify early adopters. |
| 21- Identify and prepare champions. |
| 22- Inform local opinion leaders |
| 23- Organize clinician implementation team meetings. |
| 24-Promote network weaving |
| 25- Use advisory boards and workgroups |
| 26 Involve patients/consumers and family members |
| **MANAGEMENT AND EVALUATION STRATEGIES** |
| 27-Audit and provide feedback |
| 28-Develop and implement tools for quality monitoring |
| 29-Develop and organize quality monitoring systems |
| 30-Purposely reexamine the implementation |
| 31- Obtain and use patients/consumers and family feedback |
| 32- Provide clinical supervision |
| 33- Use data warehousing techniques |
| 34- Conduct cyclical small tests of change |
| 35-Stage implementation scale up |
| 36- Model and simulate change. |

| **ORGANIZATIONAL AND WORKFLOW STRATEGIES** |
| --- |
| 37-Promote adaptability |
| 38- Tailor strategies |
| 39- Create new clinical teams |
| 40- Develop resource sharing agreements |
| 41- Remind clinicians |
| 42- Revise professional roles |
| 43- Intervene with patients/consumers to enhance uptake and adherence |
| 44- Facilitate relay of clinical data to providers |
| 45- Change physical structure and equipment |
| 46-Alter incentive/allowance structures. |
| 47-Mandate change |
